# Supplementary material
Source: PubMed Central journal article supplement (PMC5288406)

Figure S1

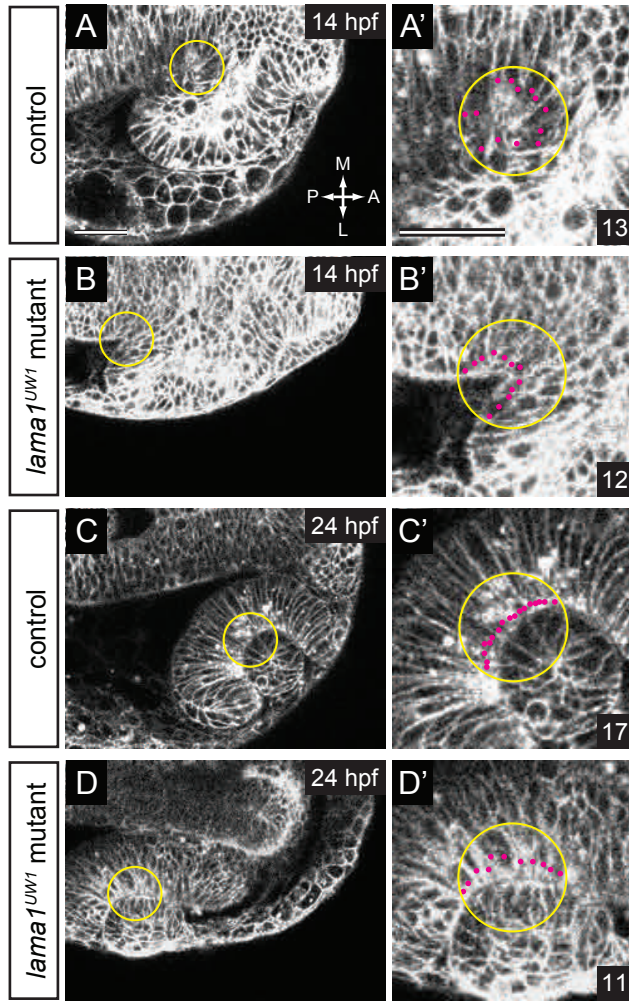

Supplement: NIHMS800097-supplement-FigS1.pdf [file NIHMS800097-supplement-FigS1.pdf]
